# Supplementary material for: The Influence of Caerulomycin A on the Intestinal Microbiota in SD Rats
Source: PubMed Central journal article supplement (PMC7281470; doi:10.3390/md18050277), 2020-05-22
Supplement: marinedrugs-18-00277-s001.pdf [file marinedrugs-18-00277-s001.pdf]

Table 1. the tags of the samples.

| Sample_ID      | clean_tags | valid_tags | valid_percent | valid minLength | valid meanLength | valid maxLength | subsample_depth | OTU_counts | Total_OTUs |
|----------------|------------|------------|---------------|-----------------|------------------|-----------------|-----------------|------------|------------|
| HDZWM954.0.1   | 37571      | 34157      | 90.91%        | 243             | 432.53           | 443             | 13877           | 958        | 3980       |
| HDZWM954.0.2   | 37432      | 33822      | 90.36%        | 243             | 431.36           | 446             | 13877           | 1291       | 3980       |
| HDZWM954.0.3   | 39577      | 35518      | 89.74%        | 243             | 430.13           | 474             | 13877           | 1152       | 3980       |
| HDZWM954.0.4   | 34721      | 31381      | 90.38%        | 243             | 429.04           | 474             | 13877           | 1031       | 3980       |
| HDZWM954.0.5   | 36248      | 33262      | 91.76%        | 242             | 432.87           | 474             | 13877           | 947        | 3980       |
| HDZWM954.0.6   | 36365      | 32477      | 89.31%        | 241             | 430.2            | 474             | 13877           | 1160       | 3980       |
| HDZWM954.0.7   | 19846      | 17347      | 87.41%        | 243             | 434              | 443             | 13877           | 887        | 3980       |
| HDZWM954.0.8   | 37735      | 33918      | 89.88%        | 241             | 429.65           | 442             | 13877           | 1166       | 3980       |
| HDZWM954.0.9   | 36788      | 33068      | 89.89%        | 243             | 430.02           | 468             | 13877           | 1128       | 3980       |
| HDZWM954.0.10  | 48301      | 43994      | 91.08%        | 239             | 430.76           | 474             | 13877           | 1131       | 3980       |
| HDZWM954.2W.1  | 50143      | 46102      | 91.94%        | 239             | 430.81           | 442             | 13877           | 1129       | 3980       |
| HDZWM954.2W.2  | 43394      | 39171      | 90.27%        | 240             | 432.27           | 474             | 13877           | 1102       | 3980       |
| HDZWM954.2W.3  | 43506      | 40110      | 92.19%        | 239             | 431.73           | 474             | 13877           | 1082       | 3980       |
| HDZWM954.2W.4  | 37642      | 33806      | 89.81%        | 241             | 427.37           | 445             | 13877           | 1207       | 3980       |
| HDZWM954.2W.5  | 41111      | 36779      | 89.46%        | 243             | 429.02           | 474             | 13877           | 1199       | 3980       |
| HDZWM954.2W.6  | 43350      | 39380      | 90.84%        | 241             | 429.81           | 474             | 13877           | 1222       | 3980       |
| HDZWM954.2W.7  | 40234      | 36436      | 90.56%        | 243             | 431.49           | 474             | 13877           | 1292       | 3980       |
| HDZWM954.2W.8  | 39018      | 34883      | 89.40%        | 243             | 429.03           | 445             | 13877           | 1117       | 3980       |
| HDZWM954.2W.9  | 41981      | 38573      | 91.88%        | 241             | 432.36           | 443             | 13877           | 1155       | 3980       |
| HDZWM954.2W.10 | 37264      | 33493      | 89.88%        | 243             | 431.12           | 474             | 13877           | 1197       | 3980       |
| HDZWM954.3W.1  | 36670      | 33017      | 90.04%        | 240             | 430.84           | 474             | 13877           | 1032       | 3980       |
| HDZWM954.3W.2  | 36269      | 32381      | 89.28%        | 243             | 429.33           | 474             | 13877           | 1013       | 3980       |
| HDZWM954.3W.3  | 41241      | 37527      | 90.99%        | 243             | 431.94           | 474             | 13877           | 916        | 3980       |
| HDZWM954.3W.4  | 25777      | 23581      | 91.48%        | 243             | 431.6            | 474             | 13877           | 951        | 3980       |
| HDZWM954.3W.5  | 40962      | 36986      | 90.29%        | 243             | 431.07           | 474             | 13877           | 1115       | 3980       |
| HDZWM954.3W.6  | 37100      | 33677      | 90.77%        | 243             | 430.83           | 474             | 13877           | 1159       | 3980       |
| HDZWM954.3W.7  | 46488      | 41862      | 90.05%        | 243             | 429.81           | 474             | 13877           | 1111       | 3980       |
| HDZWM954.3W.8  | 41035      | 36583      | 89.15%        | 241             | 430.28           | 445             | 13877           | 871        | 3980       |
| HDZWM954.3W.9  | 39758      | 36754      | 92.44%        | 239             | 430.66           | 474             | 13877           | 908        | 3980       |
| HDZWM954.3W.10 | 41466      | 37935      | 91.48%        | 240             | 430.33           | 474             | 13877           | 877        | 3980       |
| HDZWM954.4W.1  | 51139      | 46046      | 90.04%        | 241             | 429.96           | 474             | 13877           | 1082       | 3980       |
| HDZWM954.4W.2  | 36943      | 33279      | 90.08%        | 241             | 429.49           | 474             | 13877           | 1154       | 3980       |
| HDZWM954.4W.3  | 48727      | 43573      | 89.42%        | 242             | 431.27           | 442             | 13877           | 1203       | 3980       |
| HDZWM954.4W.4  | 49569      | 44866      | 90.51%        | 243             | 430.77           | 450             | 13877           | 1196       | 3980       |
| HDZWM954.4W.5  | 49483      | 43828      | 88.57%        | 241             | 429.88           | 474             | 13877           | 1109       | 3980       |
| HDZWM954.4W.6  | 40780      | 35557      | 87.19%        | 243             | 431.67           | 442             | 13877           | 1155       | 3980       |
| HDZWM954.4W.7  | 47256      | 42476      | 89.88%        | 241             | 430.64           | 457             | 13877           | 1186       | 3980       |
| HDZWM954.4W.8  | 32785      | 29106      | 88.78%        | 243             | 430.76           | 445             | 13877           | 1188       | 3980       |
| HDZWM954.4W.9  | 51218      | 46022      | 89.86%        | 243             | 430.06           | 474             | 13877           | 1092       | 3980       |
| HDZWM954.4W.10 | 40776      | 36634      | 89.84%        | 242             | 429.98           | 474             | 13877           | 1167       | 3980       |
